# Supplementary material for: Pretreatment Albumin-to-Alkaline Phosphatase Ratio Is a Prognostic Marker in Lung Cancer Patients: A Registry-Based Study of 7077 Lung Cancer Patients
Source: MDPI journal article supplement (doi:10.3390/cancers13236133), 2021-12-06
Supplement: s1 [file s1]

Table S1. Patient characteristics of included and excluded patients (N=8964).

| Characteristics                | Included patients<br>N (%) | Excluded patients <sup>a</sup><br>N (%) | P-value <sup>b</sup> |
|--------------------------------|----------------------------|-----------------------------------------|----------------------|
| Total number of patients       | 7077                       | 1887                                    |                      |
| Age, years                     |                            |                                         |                      |
| Median age (5-95% percentiles) | 70 (52-84)                 | 73 (54-87)                              | <0.001               |
| Sex                            |                            |                                         |                      |
| Female                         | 3425 (48)                  | 919 (49)                                | 0.814                |
| Male                           | 3652 (52)                  | 968 (51)                                |                      |
| Histology                      |                            |                                         |                      |
| Small cell lung cancer         | 1099 (16)                  | 212 (11)                                | <0.001               |
| Adenocarcinoma                 | 3197 (45)                  | 798 (42)                                |                      |
| Squamous cell                  | 1424 (20)                  | 440 (23)                                |                      |
| Other                          | 1067 (15)                  | 351 (19)                                |                      |
| NSCLC, otherwise unspecified   | 290 (4)                    | 86 (5)                                  |                      |
| Stage                          |                            |                                         |                      |
| I                              | 1118 (16)                  | 586 (31)                                | <0.001               |
| II                             | 540 (8)                    | 124 (7)                                 |                      |
| III                            | 1459 (21)                  | 269 (14)                                |                      |
| IV                             | 3419 (48)                  | 733 (39)                                |                      |
| Unknown                        | 541 (8)                    | 175 (9)                                 |                      |
| Performance status, ECOG       |                            |                                         |                      |
| 0                              | 2309 (33)                  | 475 (25)                                | <0.001               |
| 1                              | 2287 (32)                  | 478 (25)                                |                      |
| 2                              | 908 (13)                   | 271 (15)                                |                      |
| 3 + 4                          | 852 (12)                   | 470 (25)                                |                      |
| Unknown                        | 721 (10)                   | 193 (10)                                |                      |

NSCLC, non-small cell lung cancer; ECOG, Eastern Cooperative Oncology Group.<sup>a</sup>: Lung cancer patients excluded due to missing serum albumin and/or serum alkaline phosphatase measurement. <sup>b</sup>: P-values are calculated by the chi-square test or the nonparametric equality of medians test.
